# Supplementary material
Source: publisher figshare collection journal article supplement (https://acs.figshare.com/ndownloader/files/27184926)
Supplement: Supplementary file 1 [file 27184926]

## **Supporting Information**

### **Ultrasensitive Characterization of the Prion Protein by Surface-Enhanced Raman Scattering: Selective Enhancement via Electrostatic Tethering of the Intrinsically Disordered Domain with Functionalized Silver Nanoparticles**

Swapnil Singh,<sup>1,3†</sup> Aishwarya Agarwal,<sup>1,3†</sup> Anamika Avni<sup>1,2</sup> and Samrat Mukhopadhyay<sup>1,2,3 \*</sup>

<sup>1</sup>Centre for Protein Science, Design and Engineering, <sup>2</sup>Department of Chemical Sciences, and <sup>3</sup>Department of Biological Sciences, Indian Institute of Science Education and Research (IISER), Mohali, Knowledge City, Mohali, Punjab, India

<sup>†</sup>These authors contributed equally.

\*Corresponding author email: [mukhopadhyay@iisermohali.ac.in](mailto:mukhopadhyay@iisermohali.ac.in)

## **Materials**

All the reagents used for the experiments were purchased from Sigma (St. Louis, MO) unless otherwise specified and were used as received. The glassware used for the experiments was washed with aqua regia and rinsed with Milli-Q water before use. Ultrapure Milli-Q water (18.2 MΩcm) was used for the preparation of buffers. The pH of the buffers was adjusted to the required final value ( $\pm 0.01$ ) using a Metrohm 827 lab pH meter at room temperature ( $\sim 25^\circ\text{C}$ ).

## **Methods**

### **Preparation of silver nanoparticles**

Silver nanoparticles (Ag NPs) were synthesized by the reduction of silver nitrate ( $\text{AgNO}_3$ ) using the procedure described previously.<sup>1,2</sup> This method used for nanoparticle preparation produces a major population of quasi-spherical nanospheres along with a few nanorods. Briefly, 50 ml of 1 mM  $\text{AgNO}_3$  solution was boiled ( $97 \pm 1^\circ\text{C}$ ) under vigorous stirring (1000 rpm) using a magnetic stirrer for 30 mins. After refluxing, 1.5 ml of 1% trisodium citrate was added to the reaction mixture and the reaction was allowed to proceed till the color turned yellow-green. The reaction mixture was then cooled at room temperature under stirring

conditions for another 30 mins and was further characterized using UV-vis absorption spectroscopy, scanning electron microscopy, and zeta potential measurements. Our nanoparticle preparation also yielded similar population distribution of quasi-spherical AgNPs (~ 40-60 nm) along with a few nanorods. We considered all of them for the size distribution and calculated the average size of the nanoparticles.

### **Preparation of halide modified nanoparticles**

Halide modification of the Ag NPs was performed as described previously with slight modifications.<sup>2</sup> Briefly, Ag NPs were washed by centrifuging the 1 mL NPs colloidal suspension in a 1.5 ml microcentrifuge tube at 5000 rpm for 10 mins following which the supernatant was discarded and the precipitated colloid (~ 2-3  $\mu$ L) was resuspended in 1 mL of Milli-Q water. The process was repeated, and the concentrated colloidal suspension (50  $\mu$ L) was then mixed with 12 mM (50  $\mu$ L) of potassium halide solutions and was incubated overnight at room temperature. In order to remove the excess halides, citrate, and other impurities present in the colloidal suspension, the halide modified NPs were centrifuged (5000 rpm, 10 min) and were resuspended in an equal amount of Milli-Q water (100  $\mu$ L). The halide modified NPs (Ag IMNPs, Ag BrMNPs, Ag CIMNPs) were further characterized using absorption spectroscopy, SEM, and zeta potential measurements.

### **Protein expression and purification**

The recombinant N-terminal His-tagged full-length human prion protein, PrP (23-231) cloned in pRSET B was expressed in *E.coli* strain BL21(DE3)pLysS and was purified as described previously.<sup>3</sup> The purified protein was then refolded using size-exclusion chromatography in 20 mM sodium phosphate buffer (pH 6.8). The stop mutant, PrP (Y145Stop) (23-144) was generated from the full-length human prion protein (23-231) by substituting the tyrosine codon at position 145 with a stop codon using site-directed mutagenesis.<sup>4</sup> The recombinant N-terminal His-tagged human prion protein (23-145) cloned in pRSET B was expressed in *E.coli* strain BL21(DE3)pLysS and was purified as described previously.<sup>5</sup> The purified protein was then refolded using size-exclusion chromatography in 20 mM sodium phosphate buffer (pH 7.3). The recombinant N-terminal His-tagged human prion protein (90-231) cloned in pQE-30 was expressed in SG13009(pREP4) and was purified as described previously.<sup>3</sup> The purified protein was then refolded using size-exclusion chromatography in 20 mM sodium phosphate buffer (pH; 7.3).

### **Absorption spectroscopy**

All the absorption spectra were collected on a Thermo scientific multiskan GO UV-Vis spectrometer at room temperature ( $\sim 25^\circ\text{C}$ ). For these measurements, Ag NPs and halide modified NPs (Ag IMNPs, Ag BrMNPs, and Ag CIMNPs) were diluted 1000-fold whereas the solution of halide modified NPs with protein were diluted 100-fold.

### **Dynamic light scattering (DLS)**

DLS measurements were carried out on a Malvern Zetasizer Nano ZS90 instrument (Malvern, UK) using a He-Ne laser (632 nm) as an excitation source. The zeta potential for Ag NPs and halide coated Ag NPs (I, Br, Cl) was an average of three scans and was recorded after diluting the sample 1000 times.

### **Scanning electron microscopy (SEM)**

For SEM, 2.5  $\mu\text{L}$  of 2000-fold diluted colloidal NPs were deposited on a silicon wafer and air-dried. The measurements were carried out using a field emission scanning electron microscope (FESEM), JSM-7600F (JEOL Inc., Japan) at an accelerating voltage of 15 kV.

### **Circular dichroism spectroscopy (CD)**

For recording the far-UV CD spectra, protein concentrations of 10  $\mu\text{M}$  were used with an average of three scans. The measurements were recorded on an Applied Photophysics Chirascan CD spectrometer at room temperature.

### **Atomic force microscopy (AFM)**

AFM images of NPs and their aggregates were acquired on an Innova atomic force microscope (Bruker). The AFM was operated in the tapping mode. For imaging, the silicon nitride cantilever probe with a radius of  $\sim 8\text{ nm}$  was used. Before performing measurements, the samples were diluted 10-fold followed by which the 10  $\mu\text{L}$  aliquots were withdrawn and deposited on freshly cleaved, water-washed muscovite mica (Grade V-4 mica from SPI, PA). The samples were allowed to incubate for 10 min at room temperature and were then washed with 200  $\mu\text{L}$  of the ultrapure Milli-Q. Furthermore, the samples were kept under a gentle stream of nitrogen for 10 mins before scanning. The images were collected in NanoDrive

(v8.03) software at a resolution of  $1024 \times 1024$  pixels. The collected AFM images were further processed and analyzed using WSxM version 5.0 Develop 9.1 software.<sup>6</sup>

### Surface-enhanced Raman spectroscopy (SERS)

Bulk Raman and SERS spectra were recorded on an inVia dispersive laser Raman microscope with a  $180^\circ$  scattering geometry (Renishaw, UK) using a 785 nm laser excitation source which was focused on the sample using an objective lens (Nikon, Japan). The grating used was 1200 grooves/mm. Bulk Raman measurements of human PrP were done by drop deposition Raman spectroscopy (DDRS) method using a 300 mW laser power, 100x objective (NA = 0.9), 10 sec exposure time, and 25 accumulations. For SERS measurements, Ag IMNPs were mixed with aqueous protein solution in a 1:1 ratio (v/v) and a total volume of 50  $\mu$ l was immediately added to an aluminum crucible. The final concentration of Ag IMNPs was fixed at  $\sim 2.5$  nM, whereas final protein concentrations were 25  $\mu$ M, 5  $\mu$ M, 500 nM, and 250 nM. Also, SERS spectra for the respective buffers were recorded after Ag IMNPs addition [1:1 (v/v)] and were used for background subtraction. The beam was focused on the solution using a 3 mW laser power, a 20x objective (NA = 0.4), and a 10 sec exposure time. The measurements were repeated with different batches of protein and NPs with observed errors within the range of  $\pm 1$   $\text{cm}^{-1}$ . The Raman band of a silicon wafer at  $520$   $\text{cm}^{-1}$  was used to calibrate the spectrometer and the spectral resolution was found to be  $\sim 0.5$   $\text{cm}^{-1}$ . The data were acquired using Wire 3.1 software provided with the spectrometer. All the data were corrected for tilt in the baseline using a cubic spline interpolation method in Wire 3.1 software. The baseline-corrected Raman spectra were finally plotted in Origin 8.5 software. The deconvolution of Raman spectra was done in Origin 8.5 software as described previously.<sup>7</sup>

The analytical enhancement factor (AEF) was estimated using the previously described method.<sup>8</sup> The peak at  $\sim 1445$   $\text{cm}^{-1}$  (C-H stretching) was used as the reference. Due to weak bulk solution Raman signals and the high protein concentration requirement, the AEF estimation was rather approximate using the following relationship:<sup>8</sup>

$$\text{AEF} = (\text{I}_{\text{SERS}}/\text{C}_{\text{SERS}})/(\text{I}_{\text{Bulk}}/\text{C}_{\text{Bulk}})$$

where,  $\text{I}_{\text{SERS}}$  and  $\text{C}_{\text{SERS}}$  correspond to the peak intensity and concentration of protein from the SERS signals, whereas,  $\text{I}_{\text{Bulk}}$  and  $\text{C}_{\text{Bulk}}$  refer to the peak intensity and concentration of the protein from Raman signals. For AEF estimation, the measurements were performed under identical experimental conditions (laser power, wavelength, microscope objective, etc.).

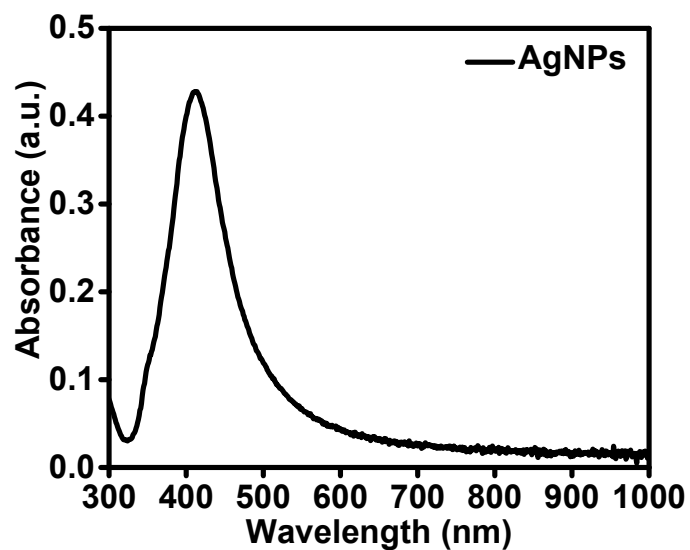

Figure S1. UV-Vis absorbance spectra for silver nanoparticles (Ag NPs)

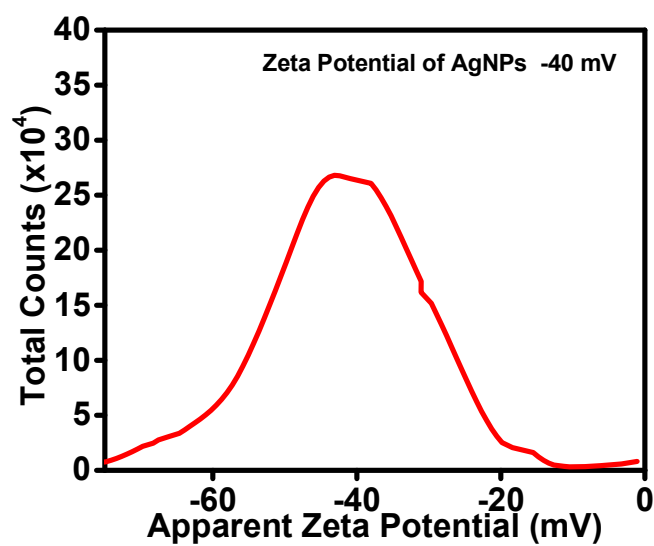

Figure S2. Zeta-potential for silver nanoparticles (Ag NPs)

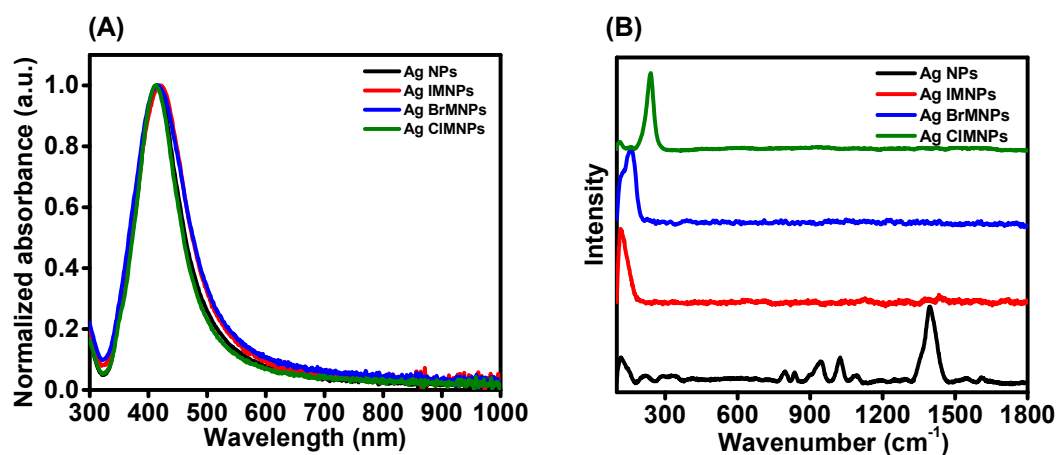

**Figure S3.** (A) UV-Vis absorbance spectra for silver colloids (Ag NPs) and halide (Cl, Br, I) functionalized Ag NPs. (B) SERS spectra for silver colloids (Ag NPs) and halide (Cl, Br, I) functionalized Ag NPs.

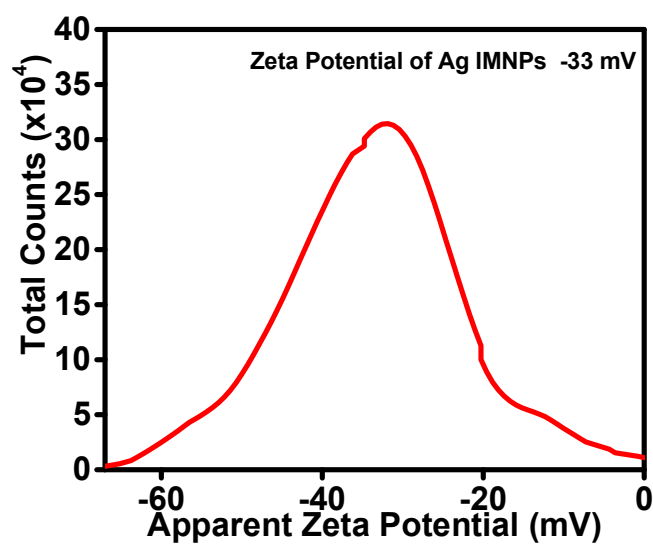

**Figure S4.** Zeta-potential for Ag IMNPs

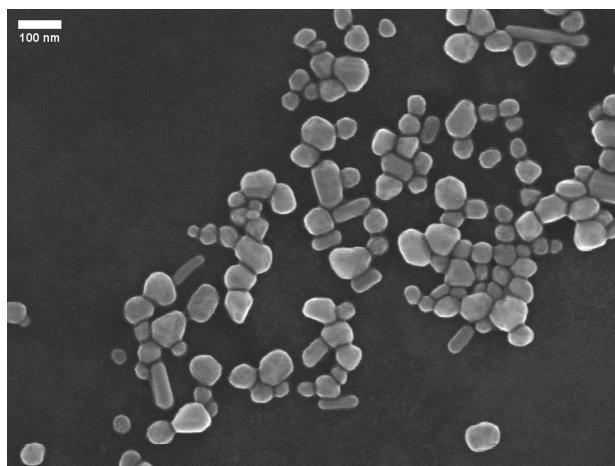

**Figure S5.** An SEM image of halide modified NPs (Ag IMNPs)

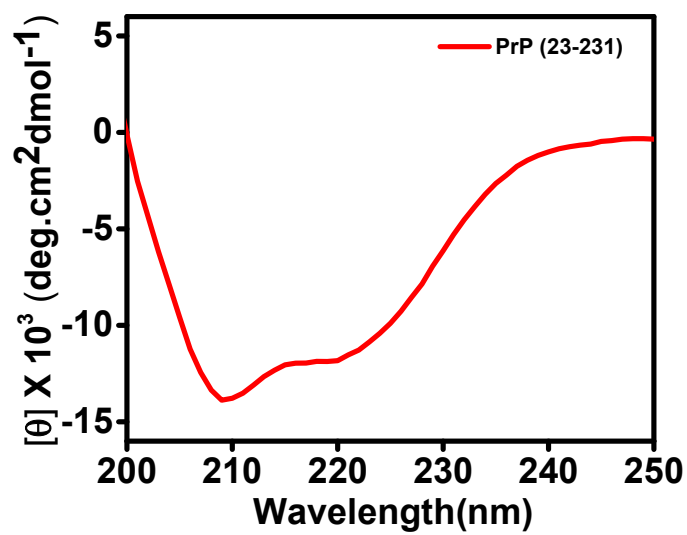

**Figure S6.** Far-UV CD spectra of PrP (23-231) in phosphate buffer (20 mM, pH 7.3)

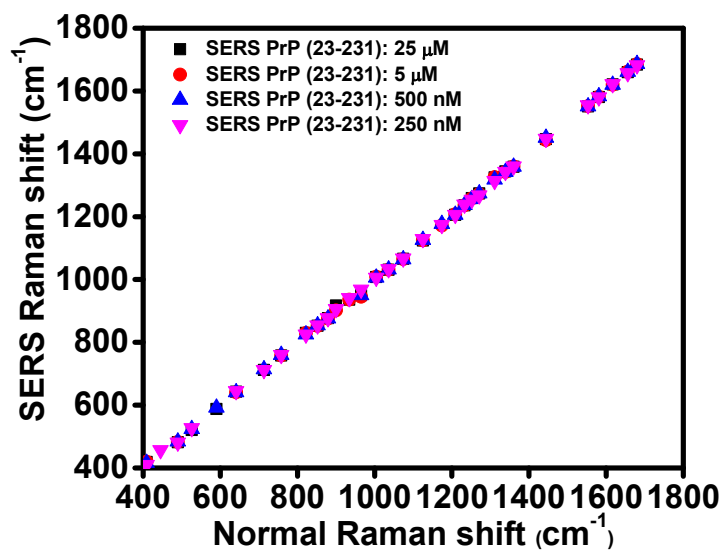

**Figure S7.** Correlation graph for PrP (23-231)

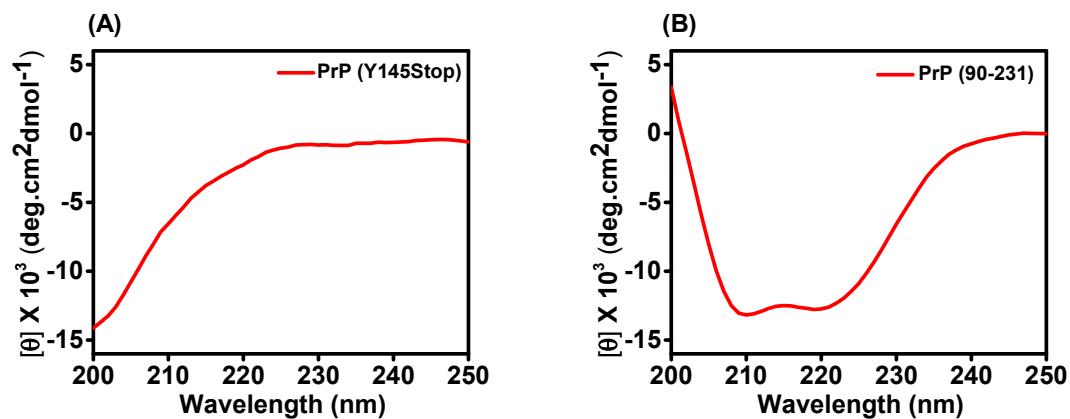

**Figure S8.** Far-UV CD spectra of (A) PrP (Y145Stop) (B) PrP (90-231) in phosphate buffer (20 mM, pH 7.3)



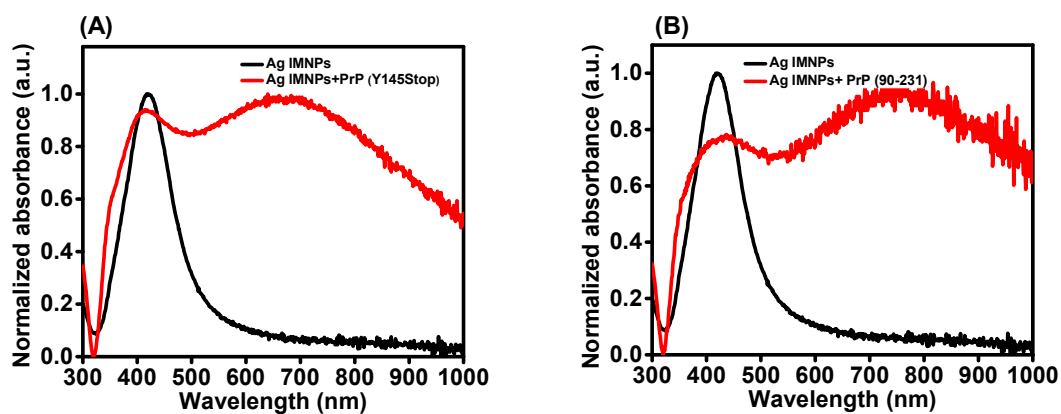

**Figure S9.** UV-Vis spectrum for Ag IMNPs: black and Ag IMNPs in presence of PrP: red (A) PrP (Y145Stop) (B) PrP (90-231)

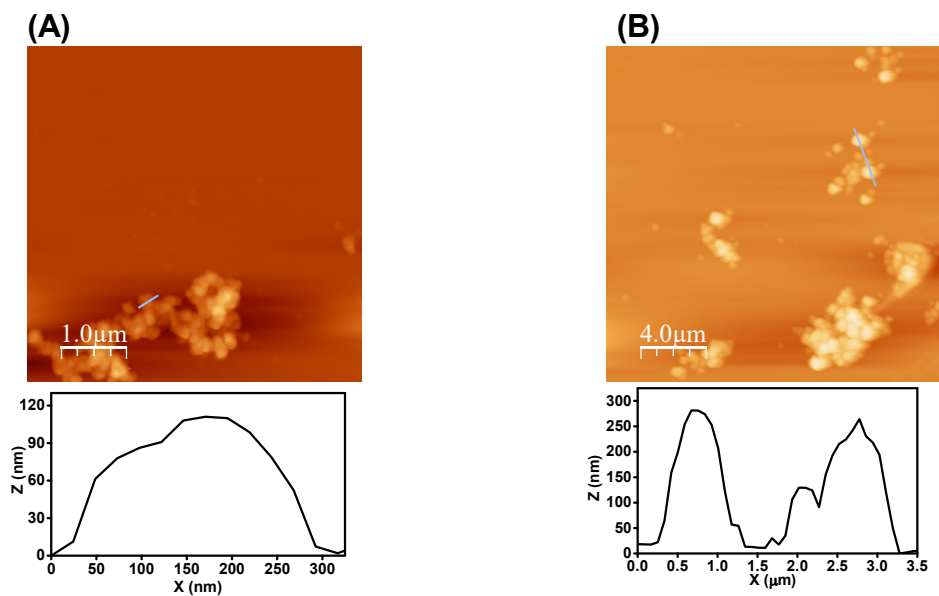

**Figure S10.** AFM image of Ag IMNPs aggregates in the presence of (A) PrP (Y145Stop) (B) PrP (90-231) with its respective height profile.

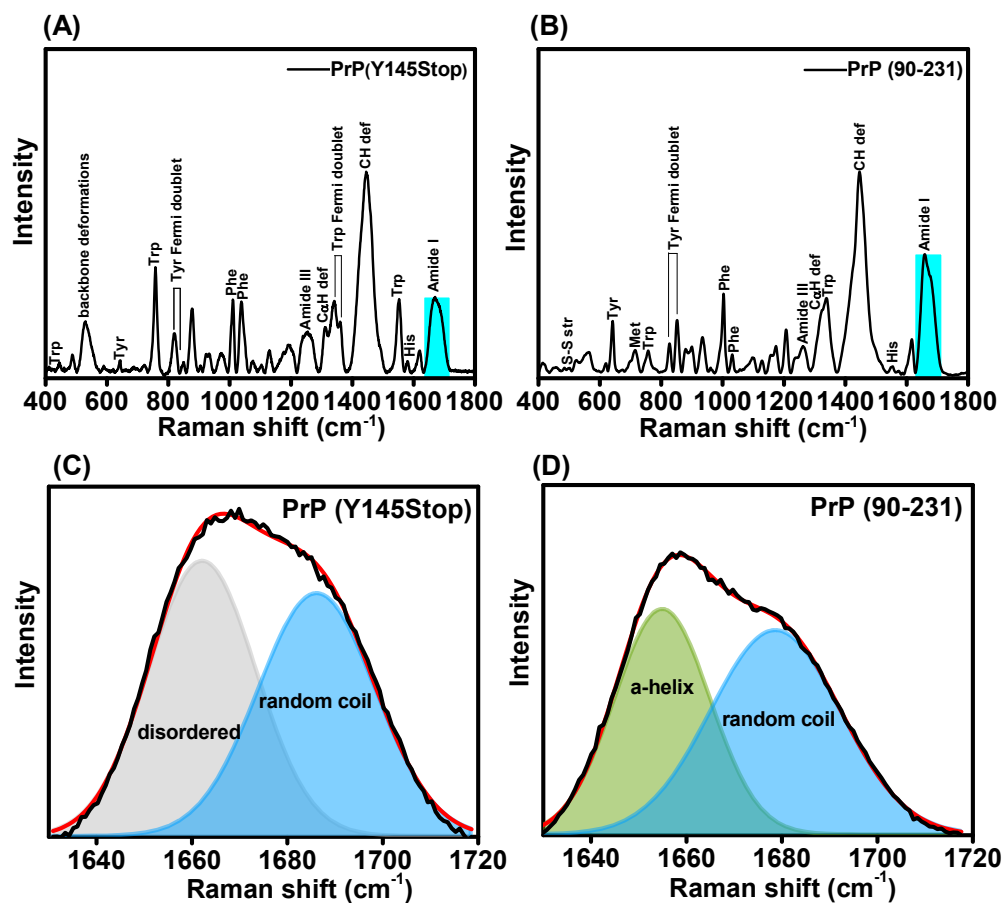

**Figure S11.** Bulk Raman spectra of (A) PrP (Y145Stop) and (B) PrP (90-231). The deconvolution of amide I (1630–1720  $\text{cm}^{-1}$ ) band for (C) PrP (Y145Stop) (D) PrP (90-231). The area under the curves represents the percentage contribution of secondary structure conformation (green:  $\alpha$ -helix, grey: disordered, blue: random coil/extended conformation); The black spectrum is the raw data and red is the cumulative fit.

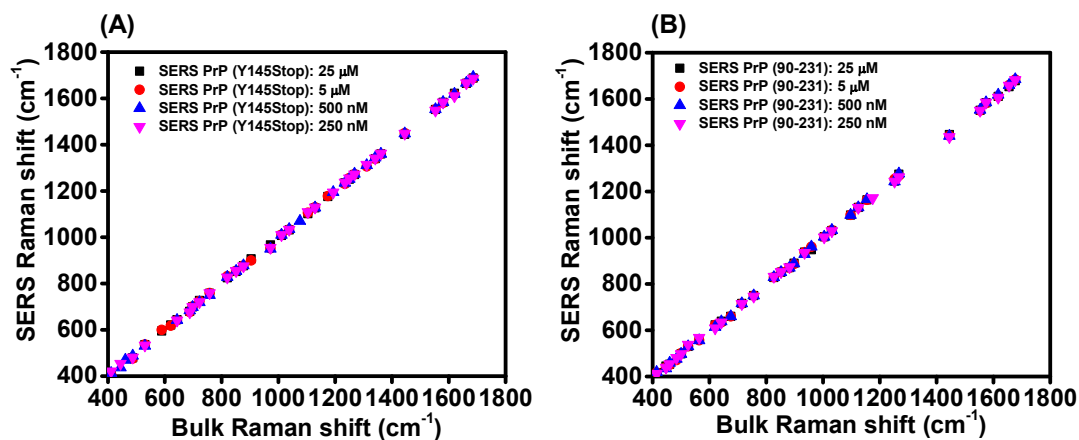

**Figure S12.** (A) Correlation graph for PrP (Y145Stop) (B) PrP (90-231).

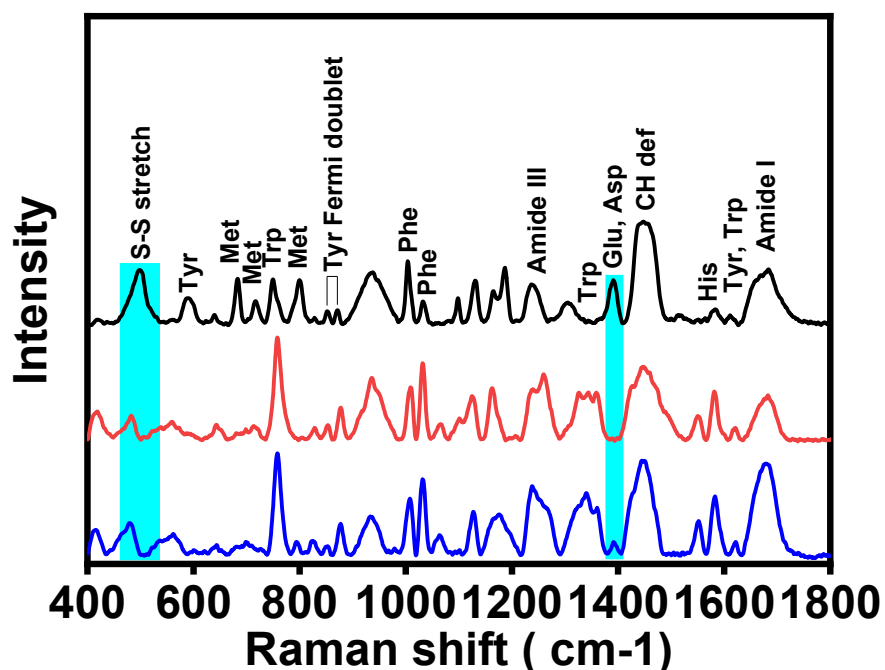

**Figure S13.** SERS spectra of different PrP constructs (25  $\mu$ M). PrP (90-231): black, PrP (23-231): red, PrP (Y145Stop): blue.

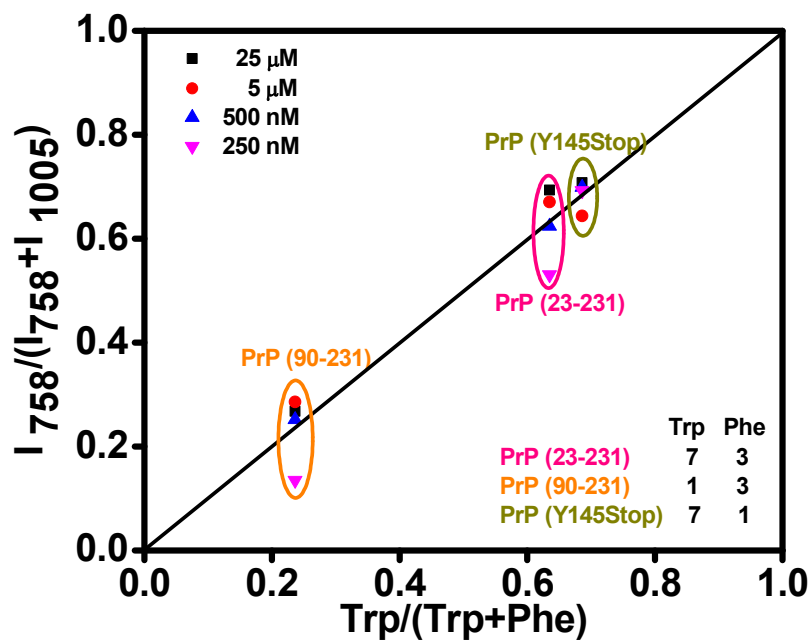

**Figure S14.** The plot between relative peak intensity ratios of Trp and Phe [ $I_{758}/(I_{758}+I_{1005})$ ] against the ratio of  $[\text{Trp}/(\text{Trp}+\text{Phe})]$  that represents the content of Trp and Phe from the SERS studies of three different constructs at different protein concentrations. The number of Trp and Phe residues are shown in the bottom right inset.

**Table S1.** Percentage contribution of different secondary structural elements obtained after deconvolution of the amide I (1630-1720  $\text{cm}^{-1}$ ) region from bulk Raman and SERS of prion protein constructs.

| PrP constructs                         | $\alpha$ -helix (%) | Disordered (%) | Coils/Extended (%) |
|----------------------------------------|---------------------|----------------|--------------------|
| PrP 23-231 (Bulk)                      | $27 \pm 2.16$       | -              | $73 \pm 2.16$      |
| PrP 23-231 (25 $\mu\text{M}$ : SERS)   | $28 \pm 7.79$       | -              | $72 \pm 7.79$      |
| PrP 23-231 (250 nM: SERS)              | $30 \pm 9.84$       | -              | $70 \pm 9.84$      |
| PrP 90-231 (Bulk)                      | $45 \pm 1.25$       | -              | $55 \pm 1.25$      |
| PrP 90-231 (25 $\mu\text{M}$ : SERS)   | $44 \pm 9.93$       | -              | $56 \pm 9.93$      |
| PrP 90-231 (250 nM: SERS)              | $40 \pm 10.80$      | -              | $60 \pm 10.80$     |
| PrP Y145Stop (Bulk)                    | -                   | $51 \pm 2.16$  | $49 \pm 2.16$      |
| PrP Y145Stop (25 $\mu\text{M}$ : SERS) | -                   | $54 \pm 2.94$  | $46 \pm 2.94$      |
| PrP Y145Stop (250 nM: SERS)            | -                   | $36 \pm 9.20$  | $64 \pm 9.20$      |

**Table S2.** Peak assignment of some selected modes of bulk Raman and SERS spectra of PrP (23-231), PrP (Y145Stop), and PrP (90-231).

|      | <b>PrP<br/>23-<br/>231<br/>SERS<br/>25<br/>μM</b> | <b>PrP<br/>23-<br/>231<br/>SERS<br/>5 μM</b> | <b>PrP<br/>23-<br/>231<br/>SERS<br/>500<br/>nM</b> | <b>PrP<br/>23-<br/>231<br/>SERS<br/>250<br/>nM</b> | <b>PrP<br/>Y145Stop<br/>Bulk</b> | <b>PrP<br/>Y145Stop<br/>SERS<br/>25 μM</b> | <b>PrP<br/>Y145Stop<br/>SERS<br/>5 μM</b> | <b>PrP<br/>Y145Stop<br/>SERS<br/>500 nM</b> | <b>PrP<br/>Y145Stop<br/>SERS<br/>250 nM</b> | <b>PrP<br/>90-<br/>231<br/>Bulk</b> | <b>PrP<br/>90-<br/>231<br/>SERS<br/>25<br/>μM</b> | <b>PrP<br/>90-<br/>231<br/>SERS<br/>5 μM</b> | <b>PrP<br/>90-<br/>231<br/>SERS<br/>500<br/>nM</b> | <b>PrP<br/>90-<br/>231<br/>SERS<br/>250<br/>nM</b> | <b>Peak<br/>Assignment<sup>§,¶</sup></b>    |
|------|---------------------------------------------------|----------------------------------------------|----------------------------------------------------|----------------------------------------------------|----------------------------------|--------------------------------------------|-------------------------------------------|---------------------------------------------|---------------------------------------------|-------------------------------------|---------------------------------------------------|----------------------------------------------|----------------------------------------------------|----------------------------------------------------|---------------------------------------------|
| 1680 | 1683                                              | 1683                                         | 1685                                               | 1685                                               | 1686                             | 1685                                       | 1687                                      | 1692                                        | 1685                                        | 1679                                | 1681                                              | 1683                                         | 1688                                               | 1677                                               | Am I (polyproline II/random β space)        |
| 1656 | 1658                                              | 1658                                         | 1658                                               | 1658                                               | 1662                             | 1662                                       | 1666                                      | 1666                                        | 1663                                        | 1655                                | 1655                                              | 1656                                         | 1659                                               | 1651                                               | Am I (alpha/β sheet and disordered)         |
| 1617 | 1621                                              | 1620                                         | 1622                                               | -                                                  | 1620                             | 1621                                       | 1618                                      | 1619                                        | 1610                                        | 1616                                | 1611                                              | 1618                                         | 1611                                               | -                                                  | Tyr, Trp                                    |
| 1580 | 1581                                              | 1582                                         | 1583                                               | 1580                                               | 1580                             | 1583                                       | 1581                                      | 1584                                        | 1583                                        | 1586                                | 1584                                              | 1585                                         | 1582                                               | 1585                                               | His, Phe, Trp                               |
| 1552 | 1551                                              | 1552                                         | 1551                                               | 1555                                               | 1553                             | 1552                                       | 1553                                      | 1553                                        | 1548                                        | 1554                                | 1551                                              | -                                            | 1550                                               | -                                                  | Trp                                         |
| 1445 | 1447                                              | 1444                                         | 1454                                               | 1448                                               | 1445                             | 1445                                       | 1450                                      | 1448                                        | 1448                                        | 1446                                | 1448                                              | 1440                                         | 1441                                               | 1438                                               | δ[CH <sub>2</sub> /CH <sub>3</sub> ]        |
| -    | -                                                 | -                                            | 1396                                               | -                                                  | -                                | 1392                                       | 1389                                      | -                                           | -                                           | -                                   | 1391                                              | 1391                                         | 1394                                               | 1390                                               | Asp, Glu ν <sub>s</sub> [COO <sup>-</sup> ] |
| 1358 | 1359                                              | 1361                                         | 1361                                               | 1360                                               | 1361                             | 1360                                       | 1360                                      | 1360                                        | 1362                                        | -                                   | -                                                 | -                                            | -                                                  | -                                                  | Trp                                         |
| 1340 | 1344                                              | 1342                                         | 1342                                               | 1344                                               | 1341                             | 1340                                       | 1339                                      | 1344                                        | 1341                                        | 1339                                | 1345                                              | -                                            | -                                                  | -                                                  | Trp/δ(CαH)                                  |
| 1273 | 1267                                              | 1269                                         | 1274                                               | 1275                                               | 1268                             | 1271                                       | 1273                                      | 1272                                        | 1272                                        | 1267                                | 1254                                              | 1255                                         | 1253                                               | 1261                                               | Am III (alpha), ρ(CHα), Trp                 |
| 1255 | 1257                                              | 1256                                         | 1256                                               | 1256                                               | 1250                             | 1251                                       | 1256                                      | 1251                                        | 1255                                        | 1253                                | 1240                                              | 1242                                         | 1241                                               | 1240                                               | Am III                                      |

|      |      |      |      |      |      |      |      |      |      |      |      |      |      |      |                                                                                   |
|------|------|------|------|------|------|------|------|------|------|------|------|------|------|------|-----------------------------------------------------------------------------------|
|      |      |      |      |      |      |      |      |      |      |      |      |      |      |      | (disordered/random)                                                               |
| 1234 | 1236 | 1236 | 1236 | 1236 | 1234 | 1235 | 1236 | 1236 | 1236 | 1235 | 1230 | 1230 | 1231 | 1227 | Am III ( $\beta$ sheet)                                                           |
| -    | -    | -    | -    | -    | -    | -    | -    | -    | -    | -    | 1186 | 1186 | 1187 | 1180 | $\delta$ (C-H), Try, Phe                                                          |
| 1174 | 1175 | 1173 | 1178 | 1174 | 1176 | 1176 | 1178 | -    | 1179 | 1174 | -    | -    | 1173 | 1172 | Tyr, Phe, $\nu$ [C-N]                                                             |
| -    | 1163 | 1163 | 1162 | 1163 | 1164 | 1167 | -    | 1167 | 1162 | -    | 1167 | 1166 | 1164 | 1166 | Tyr, $\nu$ (C $\beta$ -C $\alpha$ -H),<br>$\nu$ (C-C-H(R))                        |
| 1120 | 1125 | 1125 | 1126 | 1129 | 1129 | 1127 | 1130 | 1129 | 1129 | 1128 | 1131 | 1131 | 1131 | 1129 | $\nu$ [C-N], $\nu$ [C-C], Pro                                                     |
| 1103 | 1101 | 1106 | 1107 | -    | 1104 | 1101 | 1106 | -    | 1109 | 1102 | -    | -    | -    | -    | $\nu$ [C-C], $\nu$ [C-N],<br>$\nu$ [C-O]                                          |
| 1053 | 1066 | 1065 | 1064 | 1067 | -    | 1063 | 1062 | -    | 1066 | 1066 | 1062 | 1065 | 1058 | -    | $\nu$ [C-C] of skeletal<br>of random<br>conformation $\nu$ [C-<br>N], $\nu$ [C-O] |
| 1036 | 1032 | 1032 | 1033 | 1034 | 1038 | 1032 | 1034 | 1035 | 1033 | 1032 | 1033 | 1034 | 1034 | 1032 | Phe [ $\delta$ (R(CH))]                                                           |
| 1010 | 1009 | 1010 | 1007 | 1012 | 1011 | 1011 | 1011 | 1010 | 1010 | -    | -    | -    | -    | -    | Trp                                                                               |
| 1005 | 1005 | 1005 | 1004 | 1002 | 1005 | 1004 | 1005 | -    | 1007 | 1003 | 1004 | 1004 | 1004 | 1001 | Phe [ $\delta$ (R <sub>breathing</sub> )]                                         |
| 933  | 936  | 936  | 932  | 941  | 933  | 933  | 935  | 934  | 934  | 934  | 938  | 937  | 938  | 935  | $\nu$ [N-C $\alpha$ -C], Pro, Val                                                 |
| 923  | -    | -    | -    | 924  | 924  | 923  | 924  | 924  | 922  | -    | -    | 918  | 916  | 921  | $\nu$ [N-C $\alpha$ -C], Pro, Val                                                 |
| 878  | 877  | 876  | 876  | 877  | 877  | 877  | 878  | 878  | 875  | 879  | 871  | 871  | 870  | 873  | Trp [ $\delta$ (R+r)]                                                             |

|     |     |     |     |     |     |     |     |     |     |     |     |     |     |     |                                                                                       |
|-----|-----|-----|-----|-----|-----|-----|-----|-----|-----|-----|-----|-----|-----|-----|---------------------------------------------------------------------------------------|
| 852 | 854 | 853 | 855 | 855 | 851 | 853 | 855 | 854 | 854 | 852 | 852 | 853 | 854 | 853 | Tyr [ $\delta(R_{\text{breathing}})$ ]                                                |
| 822 | 829 | 827 | 825 | 825 | 820 | 825 | 832 | 828 | 826 | 827 | 828 | 829 | 829 | 832 | Tyr [ $\delta_{\text{oop}}(R_{\text{breathing}})$ ]                                   |
| 776 | 805 | 806 | -   | -   | -   | 794 | 799 | -   | -   | -   | 800 | 800 | 800 | 797 | Met [ $\nu_a(\text{C-S-C})$ ],<br>Val, Tyr, $\delta[\text{NH}]$ ,<br>$\nu[\text{CH}]$ |
| 758 | 758 | 758 | 759 | 758 | 758 | 758 | 759 | 760 | 759 | 757 | 750 | 750 | 750 | 747 | Trp [ $\delta(R_{\text{breathing}})$ ]                                                |
| 710 | 712 | -   | 714 | 712 | 722 | 727 | 724 | -   | 720 | 715 | 716 | 716 | 715 | 714 | Met [ $\nu(\text{C-S})$ ]                                                             |
| 682 | 682 | -   | 684 | -   | 688 | 680 | -   | 684 | -   | 687 | 683 | 683 | 682 | 683 | Met [ $\nu(\text{C-S})$ ], $\delta\text{CH}$ ]                                        |
| 641 | 643 | 641 | 641 | 645 | 643 | 644 | 642 | 642 | -   | 642 | 639 | 638 | 642 | 633 | Tyr [ $\gamma(\text{C-C})$ ]                                                          |
| 526 | 521 | -   | 524 | 527 | 530 | 536 | 537 | 531 | 533 | 524 | 530 | -   | 531 | -   | $\delta[\text{skeletal}]$                                                             |
| -   | 506 | 507 | 504 | 507 | -   | -   | -   | -   | -   | 502 | 499 | 497 | 501 | 497 | Cys [ $\nu[(\text{S-S})]$ ]                                                           |
| 490 | 483 | 484 | 485 | 482 | 487 | 479 | 476 | 488 | 481 | 485 | -   | -   | -   | 481 | $\delta[\text{Ring}]$ , $\tau[\text{Ring}]$                                           |
| 410 | 419 | 421 | 417 | 421 | 411 | 414 | 424 | 413 | 411 | 413 | 417 | 419 | 417 | 412 | Trp                                                                                   |

§  $\delta$ , bending;  $\tau$ , torsion;  $\nu$ , stretching;  $\gamma$ , twisting;  $\rho$ , rocking; R, phenyl ring; r, pyrrole ring; a, asymmetric; s, symmetric

¶ The peak assignments have been described previously.<sup>9-12</sup>



## References

1. Lee, P. C.; Meisel, D. Adsorption and Surface-Enhanced Raman of Dyes on Silver and Gold Sols. *J. Phys. Chem.* **1982**, 86, 3391–3395.
2. Xu, L. J.; Zong, C.; Zheng, X. S.; Hu, P.; Feng, J. M.; Ren, B. Label-Free Detection of Native Proteins by Surface-Enhanced Raman Spectroscopy Using Iodide-modified Nanoparticles. *Anal. Chem.* **2014**, 86, 2238–2245.
3. Agarwal, A.; Das, D.; Banerjee, T.; Mukhopadhyay, S. Energy Migration Captures Membrane-induced Oligomerization of the Prion Protein. *Biochim. Biophys. Acta - Proteins Proteomics* **2020**, 1868, 140324(1-7).
4. Agarwal, A.; Rai, S. K.; Avni, A.; Mukhopadhyay, S. An Intrinsically Disordered Pathological Variant of the Prion Protein Y145Stop Transforms into Self-Templating Amyloids via Liquid-Liquid Phase Separation. *bioRxiv* 2021, <http://doi.org/10.1101/2021.01.09.426049>
5. Morillas, M.; Swietnicki, W.; Gambetti, P.; Surewicz, W. K. Membrane Environment Alters the Conformational Structure of the Recombinant Human Prion Protein Membrane Environment Alters the Conformational Structure of the Recombinant Human Prion Protein. *J. Biol. Chem.* **1999**, 274, 36859–36865.
6. Horcas, I.; Fernandez, R.; Gomez-Rodriguez, J. M.; Colchero, J.; Gomez-Herrero, J.; Baro, A. M. WSXM: A Software for Scanning Probe Microscopy and a Tool for Nanotechnology. *Rev. Sci. Instrum.* **2007**, 78, 13705(1-8).
7. Bhattacharya, M.; Jain, N.; Dogra, P.; Samai, S.; Mukhopadhyay, S. Nanoscopic Amyloid Pores Formed via Stepwise Protein Assembly. *J. Phys. Chem. Lett.* **2013**, 4, 480–485.
8. Le Ru, E. C.; Blackie, M.; Meyer, M.; Etchegoin, P. G. Surface-Enhanced Raman Scattering Enhancement Factors: A Comprehensive Study. *J. Phys. Chem. C* **2007**, 111, 13794–13803.
9. Rygula, A.; Majzner, K.; Marzec, K. M.; Kaczor, A.; Pilarczyk, M.; Baranska, M. Raman Spectroscopy of Proteins: A review. *J. Raman Spectrosc.* **2013**, 44, 1061–1076.
10. Tuma, R. Raman Spectroscopy of Proteins: From Peptides to Large Assemblies. *J. Raman Spectrosc.* **2005**, 36, 307–319.
11. Szekeres, G. P.; Kneipp, J. SERS Probing of Proteins in Gold Nanoparticle Agglomerates. *Front. Chem.* **2019**, 7, 30.
12. Mensch, C.; Bultinck, P.; Johannessen, C. Conformational Disorder and Dynamics of Proteins Sensed by Raman Optical Activity. *ACS Omega* **2018**, 3, 12944–12955.
